# Supplementary material for: Wheat germ agglutinin modified magnetic iron oxide nanocomplex as a cell membrane specific receptor target material for killing breast cancer cells
Source: Royal Society of Chemistry journal article supplement (doi:10.1039/c8tb01170b), 2018-01-01
Supplement: c8tb01170b1.pdf [file c8tb01170b1.pdf]

## Supporting electronic information

### Wheat germ agglutinin modified magnetic iron oxide nanocomplex as cell membrane specific receptor target material for killing breast cancer cells

Aekta Upadhyay, Ravinder Kandi and Chebrolu Pulla Rao\*

*Bioinorganic Laboratory, Department of Chemistry, Indian Institute of Technology  
Bombay, Powai, Mumbai – 400 076, India, E-mail: [cprao@iitb.ac.in](mailto:cprao@iitb.ac.in)*

## Contents

|                                                                                                                                                                                                                  |    |
|------------------------------------------------------------------------------------------------------------------------------------------------------------------------------------------------------------------|----|
| <b>SI 01</b> Synthesis of Fe <sub>3</sub> O <sub>4</sub> NPs (NC <sub>1</sub> ), silica coated Fe <sub>3</sub> O <sub>4</sub> NPs (NC <sub>2</sub> )<br>and modification of surface of NC <sub>2</sub> with FITC | S2 |
| <b>SI 02</b> Hysteresis curve and PXRD for NC <sub>3</sub>                                                                                                                                                       | S3 |
| <b>SI 03</b> Characterisation of purified WGA                                                                                                                                                                    | S3 |
| <b>SI 04</b> Fluorescence microscopy images of NC <sub>4</sub> and NC <sub>5</sub>                                                                                                                               | S3 |
| <b>SI 05</b> Stability of NC <sub>5</sub> in different pH mediums                                                                                                                                                | S4 |
| <b>SI 06</b> Stability of NC <sub>5</sub> in 10% FBS                                                                                                                                                             | S4 |
| <b>SI 07</b> Comparision of cell viaibility of NC <sub>5</sub> (100 µg) on different cells                                                                                                                       | S5 |
| <b>SI 08</b> Cell internalisation of NC <sub>3</sub> by fluorescence microscopy                                                                                                                                  | S5 |
| <b>SI 09</b> Photographs of magnet kept under cell culture dish                                                                                                                                                  | S6 |

**SI 01 Synthesis of iron oxide nanoparticles ( $\text{Fe}_3\text{O}_4$  NPs; NC<sub>1</sub>):** One gram of  $\text{FeCl}_2 \cdot 4\text{H}_2\text{O}$  and 2.7 g of  $\text{FeCl}_3 \cdot 6\text{H}_2\text{O}$  were taken in 20 ml of water in a two neck RB flask and the solutions were purged with  $\text{N}_2$ . Five ml of ammonia solution (25 % GR), 2 ml of hydrazine hydrate and 43 ml of water were taken in another RB flask and the contents were purged with  $\text{N}_2$ . The latter was added through a dropping funnel to a mixture of iron chloride solution dropwise under vigorous stirring. The reaction temperature was maintained at 90 °C for 30 min. Four grams of citric acid in 10 ml of water was later added to the solution and the heating was continued for another 1.5 h at 90 °C. A black product was formed which was taken out with the help of a magnet and the product was washed with water and dried under vacuum.

**Synthesis of silica coated  $\text{Fe}_3\text{O}_4$  nanoparticles ( $\text{Fe}_3\text{O}_4@\text{SiO}_2$  NPs; NC<sub>2</sub>):** Thirty milligrams of NC<sub>1</sub> were dispersed in 100 ml of water and 1 ml of hydrazine dihydrate was added to it. The suspension was sonicated for 30 min and then 0.4 ml of TEOS was added. The mixture was refluxed at 90 °C for 3 hours. The silica coated iron oxide NPs (NC<sub>2</sub>) were separated under magnet and washed with ethanol and dried.

**Synthesis of FITC tagged  $\text{Fe}_3\text{O}_4$  nanoparticles ( $\text{Fe}_3\text{O}_4@\text{SiO}_2@\text{FITC}@\text{SiO}_2\text{-NH}_2$ ; NC<sub>3</sub>):** FITC (11.5 mg) was dissolved in ethanol solution containing APTS. This mixture is called DYE solution. In another vial, 10 mg of NC<sub>2</sub> were dispersed in 1 ml ethanol containing 60  $\mu\text{l}$  of ammonia. To this, 20  $\mu\text{l}$  of DYE solution was added and sonicated for 30 min. The particles are separated under magnet and then dispersed in 500  $\mu\text{l}$  of ethanol. This magnetic particle mixture was added to a solution of APTS in toluene dropwise and vigorously stirred for 4 h. The product formed was collected under magnet and washed several times with ethanol to remove any unreacted FITC.

## SI 02 PXRD and magnetization for NC<sub>3</sub>

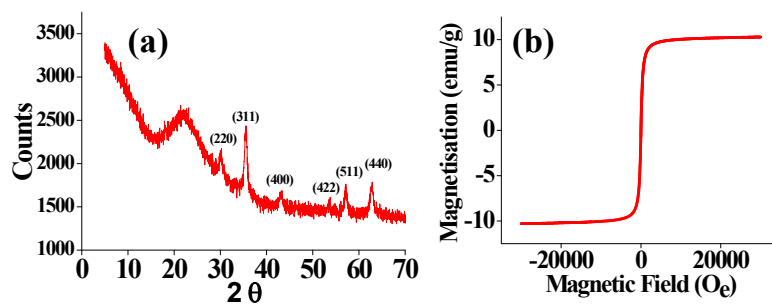

**Figure S01** (a) PXRD and (b) Magnetization for NC<sub>3</sub>

## SI 03 Characterizations of the purified WGA

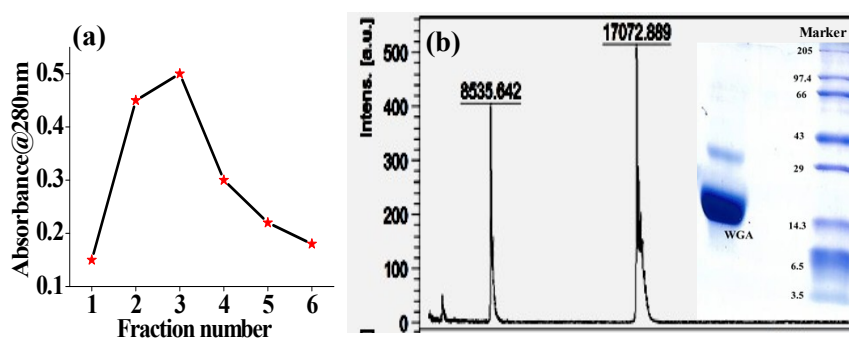

**Figure S02:** (a) Absorbance value of WGA collected through different fractions from column (b) MALDI spectra of purified WGA. Inset shows the SDS-PAGE of WGA

## SI 04 Fluorescence microscopy images of NC<sub>4</sub> and NC<sub>5</sub>

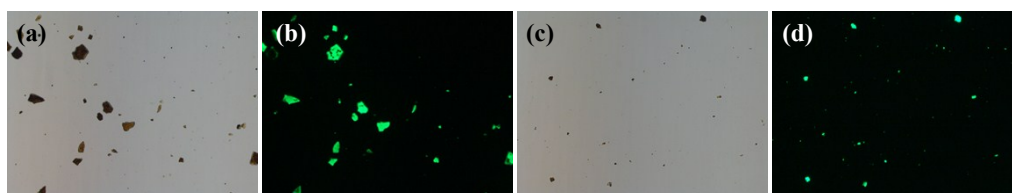

**Figure S03:** (a, c) Bright field and (b, d) fluorescence image of NC<sub>4</sub> and NC<sub>5</sub> respectively

**SI 05** Stability of NC<sub>5</sub> in different pH mediums

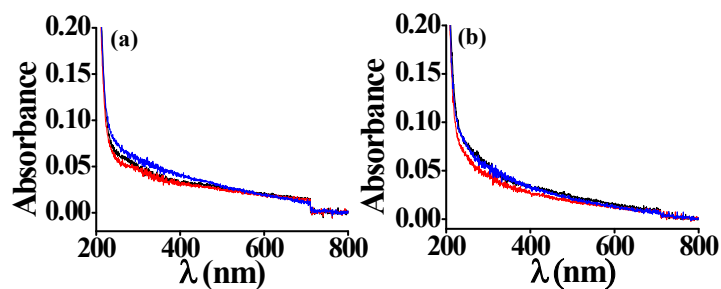

**Figure S04:** Stability of NC<sub>5</sub> in 10 mM PBS in (a) pH = 5.0 and (b) pH = 7.4 at different time points. Color code: (—) 12 hrs, (—) 24 hrs and (—) 36 hrs.

**SI 06** Stability of NC<sub>5</sub> in 10% FBS

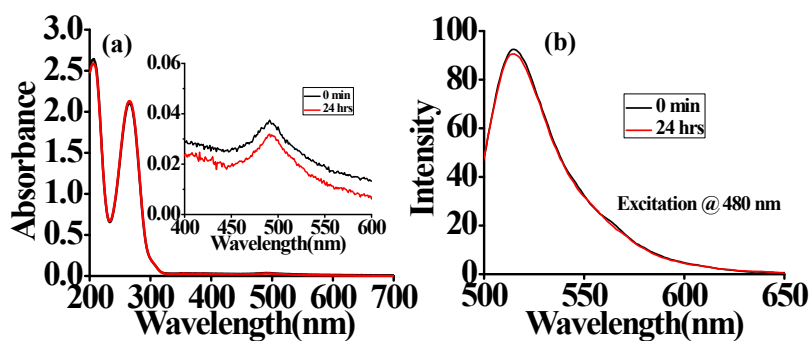

**Figure S05:** (a) UV-Visible spectra and (b) Fluorescence spectra of NC<sub>5</sub> before (black line) and after incubation of 24 hrs in 10% FBS (red line)

**SI07:** Comparison of cell viability of NC<sub>5</sub> (100 µg) on different cells

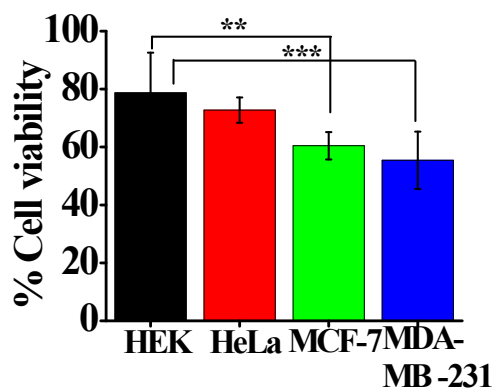

**Figure S06:** Cell viability of NC<sub>5</sub> (100 µg) on four cells HEK, HeLa, MCF-7 and MDA-MB-231.

**SI 08** Cell internalization of NC<sub>3</sub> by fluorescence microscopy

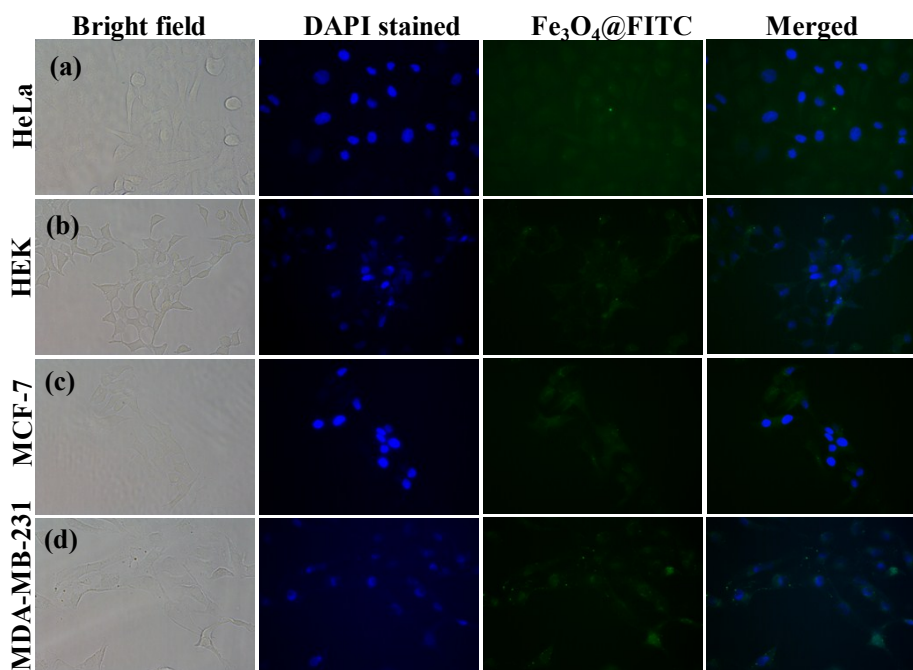

**Figure S07:** Fluorescence microscope images of different cell lines when treated with NC<sub>3</sub>. Both the x and y axis were labelled accordingly

**SI 09** Photographs of magnet kept under cell culture dish

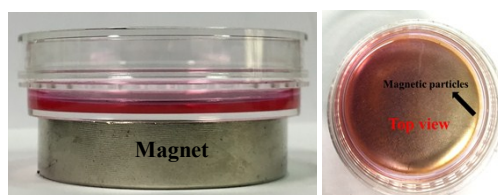

**Figure S08:** Side view and top view of cell culture dish incubated with magnet
